# Supplementary material for: Solubilized Amnion Membrane Hyaluronic Acid Hydrogel Accelerates Full‐Thickness Wound Healing
Source: PubMed Central journal article supplement — Stem Cells Transl Med. 2017 Sep 23;6(11):2020–32. doi: 10.1002/sctm.17-0053 (PMC6430059; doi:10.1002/sctm.17-0053), 2017-09-23

**A Hydrogel Swelling**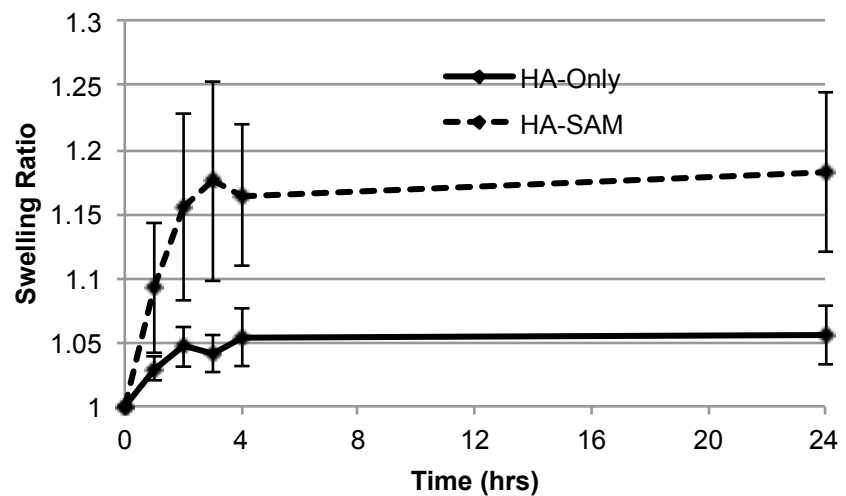**B Protein Release**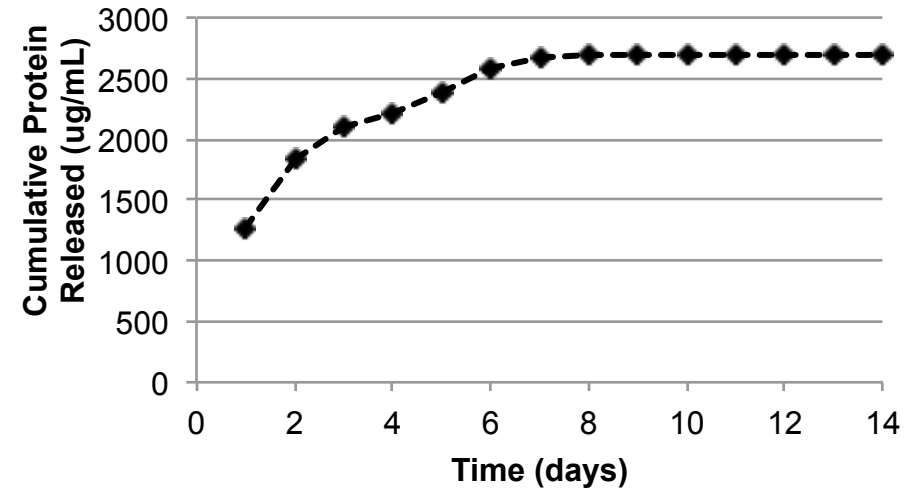**C First Order Release Model**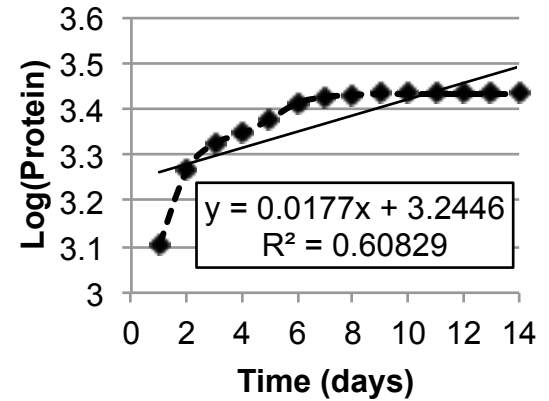**D Hixson-Crowell Release Model**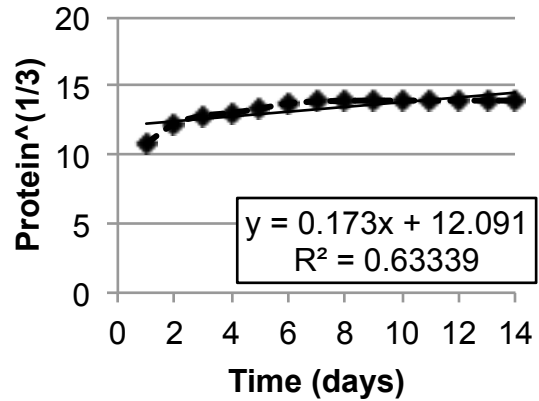**E Higuchi Release Model**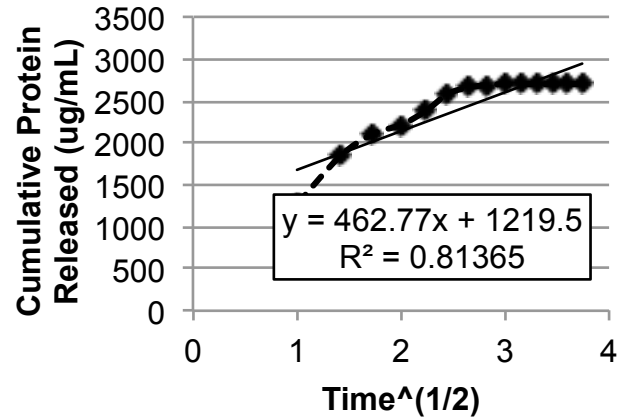

Supplement: SCT3-6-2020-s002.pdf [file SCT3-6-2020-s002.pdf]
